# Supplementary material
Source: Royal Society of Chemistry journal article supplement (doi:10.1039/d6cc01225f)
Supplement: d6cc01225f1.pdf [file d6cc01225f1.pdf]

## Supporting Information

### Repurposing Methylene Blue as Activatable Prodrugs for Precise Disease Theranostics

Junliang Zhou,<sup>\*a,b</sup> Liang Su,<sup>b,c</sup> Tian-Bing Ren,<sup>b</sup> Lin Yuan<sup>\*b</sup>

<sup>a</sup> School of Pharmacy, Hunan University of Chinese Medicine, Changsha, 410208, P. R. China. Email: zjl1046@hnu.edu.cn;

<sup>b</sup> State Key Laboratory of Chemo and Biosensing, College of Chemistry and Chemical Engineering, Hunan University, Changsha, 410082, P. R. China. Email: lyuan@hnu.edu.cn;

<sup>c</sup> Qianjin Pharmaceutical CO., LTD., Zhuzhou, 412400, P. R. China.

**Table S1. Activation strategies for MB-based activatable prodrugs in theranostics**

| Activation Strategy | Triggers                                                     | Advantages                                                                                                                       | Limitations                                                                                                                                | Current Challenges                                                                                                                        |
|---------------------|--------------------------------------------------------------|----------------------------------------------------------------------------------------------------------------------------------|--------------------------------------------------------------------------------------------------------------------------------------------|-------------------------------------------------------------------------------------------------------------------------------------------|
| ROS                 | H <sub>2</sub> O <sub>2</sub> , HOCl, •OH, ONOO <sup>-</sup> | High pathological relevance; Broadly applicable across cancers and inflammatory diseases; Relatively simple chemical design      | Intrinsically low specificity due to ROS presence in multiple pathological processes; Prone to off-target activation and background signal | Developing ROS subtype-selective prodrugs; Improving activation thresholds; Integrating multi-stimuli logic gating to enhance specificity |
| GSH                 | Intracellular GSH                                            | Exploits redox imbalance in tumors; Can deplete GSH to amplify oxidative stress and enhance PDT/SDT efficacy                     | Significant heterogeneity of GSH levels across tumor types and stages; Possible premature activation in normal tissues with high GSH       | Achieving tumor-selective activation; Balancing stability vs responsiveness; Integrating dual-trigger systems                             |
| Enzyme              | TYR, FAP $\alpha$ , NQO1, HDAC                               | High molecular specificity; Suitable for personalized theranostics based on biomarker expression                                 | Tumor heterogeneity leads to uneven enzyme expression; Enzyme activity may vary temporally and spatially                                   | Identifying robust and universal enzymatic biomarkers; Overcoming heterogeneous activation                                                |
| Hypoxia             | Low O <sub>2</sub> , reductive environment                   | Highly relevant to solid tumors; Can synergize with PDT-induced hypoxia; Enables selective activation in poorly perfused regions | Hypoxia heterogeneity within tumors; Relatively slow activation kinetics                                                                   | Combining with oxygen modulation strategies; Integrating feedback amplification mechanisms                                                |
| NIR light           | 650–900 nm light                                             | Precise spatiotemporal control; Noninvasive; Enables real-time imaging-guided therapy                                            | Limited tissue penetration (especially in NIR-I window); Potential phototoxicity; Dependence on external equipment                         | Improving light delivery systems; Minimizing photodamage while maintaining efficacy                                                       |
| Ultrasound          | Ultrasound                                                   | Deep tissue penetration; Noninvasive; Clinically translatable; Suitable for deep-seated tumors                                   | Limited intrinsic targeting specificity; Activation efficiency may be moderate; ROS generation can be oxygen-dependent                     | Enhancing tumor accumulation via delivery systems; Improving activation efficiency                                                        |
| Bioorthogonal       | Exogenous                                                    | Exceptional selectivity; Minimal interference with biological systems; Precise spatiotemporal control                            | Requires delivery of multiple components; Complex pharmacokinetics; Potential mismatch in reaction partners in vivo                        | Improving in vivo reaction kinetics; Simplifying system design; Ensuring co-localization of reactants                                     |

**Table S2. MB-based activatable prodrugs for disease theranostics**

| Prodrugs No. | Triggering mechanism                                       | Therapeutic payload                                    | Disease model                 | Key outcome                                                            |
|--------------|------------------------------------------------------------|--------------------------------------------------------|-------------------------------|------------------------------------------------------------------------|
| 1            | HClO;<br>HRP+H <sub>2</sub> O <sub>2</sub> ;<br>Ultrasound | Melphalan                                              | Melanoma                      | Significant tumor inhibition                                           |
| 2            | ROS                                                        | Camptothecin (CPT)                                     | Metastatic cervical cancer    | 99.9% tumor inhibition;<br>100% survival;<br>No systemic toxicity      |
| 3            | ROS                                                        | Doxorubicin (DOX)                                      | Liver cancer (orthotopic)     | Enhanced tumor retention;<br>Extended survival time                    |
| 4            | hROS                                                       | Chlorambucil (CLB)                                     | HepG2 tumors                  | Significant tumor growth inhibition                                    |
| 5            | ROS                                                        | MB (NIRF imaging agent)                                | HeLa tumor                    | High tumor-to-background ratio;<br>Enables fluorescence-guided surgery |
| 6            | H <sub>2</sub> O <sub>2</sub>                              | MB (photosensitizer)                                   | HepG2 tumors                  | Enhanced ROS generation;<br>Improved PDT efficacy;<br>Good biosafety   |
| 7            | HClO                                                       | Indomethacin;<br>MB (photosensitizer)                  | Lung cancer, metastasis       | Induces ICD;<br>Enhances CD8 <sup>+</sup> T cell infiltration          |
| 8            | HOCl;<br>ONOO <sup>-</sup>                                 | 4-Hydroxybenzaldehyde (4-HBA);<br>MB (photosensitizer) | Melanoma                      | 98.8% tumor inhibition;<br>No recurrence after single treatment        |
| 9            | HClO                                                       | QDAU5;<br>MB (photosensitizer)                         | Melanoma                      | Induces apoptosis and immune activation                                |
| 10           | GSH                                                        | MB (photosensitizer)                                   | HeLa tumors                   | Effective PDT;<br>No systemic toxicity                                 |
| 11           | GSH                                                        | Cisplatin;<br>MB (photosensitizer)                     | Drug-resistant A549 tumors    | 96.4% tumor inhibition;<br>Reverses drug resistance                    |
| 12           | GSH                                                        | R837 (immunoadjuvant);<br>MB (sonosensitizer)          | CT26 tumors (bilateral model) | Activates immune response;<br>Inhibits primary & distant tumors        |
| 13           | GSH                                                        | CPT;<br>MB (photosensitizer)                           | 4T1 breast cancer             | Nearly complete tumor inhibition;<br>Synergistic PDT + chemotherapy    |
| 14           | Hypoxic                                                    | AZO-PRO (PROTAC);<br>MB (photosensitizer)              | MCF-7 tumors                  | Enhanced antitumor efficacy;<br>No systemic toxicity                   |
| 15           | TYR                                                        | MB (photosensitizer)                                   | Melanoma                      | Selective photokilling                                                 |
| 16           | FAP $\alpha$                                               | MB (photosensitizer)                                   | 4T1 tumors                    | GSH depletion; Effective PDT                                           |
| 17           | FAP $\alpha$                                               | MB (photosensitizer)                                   | 4T1 tumors (bilateral model)  | Activates immune response;<br>Inhibits primary & distant tumors        |
| 18           | NQO1                                                       | MB (NIRF imaging agent)                                | A549 tumors                   | Selective tumor theranostics                                           |
| 19           | HDAC6                                                      | MB (photosensitizer;<br>MAO-A inhibitor)               | Glioma                        | Induces apoptosis;<br>Inhibits migration and invasion                  |
| 20           | NIR light                                                  | STAT3 inhibitor;<br>MB (photosensitizer)               | MDA-MB-231 tumors             | 92.7% tumor suppression;<br>Inhibits metastasis                        |
| 21           | NIR light                                                  | TMG (alkalizing agent);<br>MB (photosensitizer)        | 4T1 tumors                    | Induces mitochondrial dysfunction and apoptosis                        |
| 22           | NIR light                                                  | MB (photosensitizer)                                   | 4T1 tumors                    | Effective tumor inhibition                                             |
| 23           | NIR light                                                  | Nitrogen mustard;<br>MB (photosensitizer)              | Melanoma                      | Strong cytotoxicity;<br>Effective tumor inhibition                     |
| 24           | Ultrasound                                                 | IDO-1 inhibitor;<br>MB (sonosensitizer)                | 4T1 TNBC tumors               | Induces ICD;<br>Suppresses recurrence and metastasis                   |
| 25           | Ultrasound                                                 | Ferrocene;<br>MB (sonosensitizer)                      | 4T1 tumors                    | Induces ferroptosis;<br>Complete tumor inhibition                      |

|    |                          |                                                                                              |                     |                                                                                      |
|----|--------------------------|----------------------------------------------------------------------------------------------|---------------------|--------------------------------------------------------------------------------------|
| 26 | Ultrasound               | BRD4 degrader;<br>MB (sonosensitizer)                                                        | 4T1 tumors          | Efficient BRD4 degradation;<br>Enhanced tumor suppression                            |
| 27 | Bioorthogonal<br>trigger | MB (sonosensitizer)                                                                          | EMT-6 tumors        | Enhanced tumor suppression                                                           |
| 28 | Bioorthogonal<br>trigger | MB (sonosensitizer)                                                                          | HeLa cells          | Strong cytotoxicity                                                                  |
| 29 | ROS                      | Iron chelator                                                                                | Skin allograft      | Effectively suppressed immune<br>rejection;<br>Reduced skin inflammation             |
| 30 | ROS                      | 5-ASA                                                                                        | IBD                 | Noninvasive diagnosis;<br>Reduced inflammation                                       |
| 31 | HOCl                     | Ibuprofen                                                                                    | Osteoarthritis      | Reduced inflammation;<br>Cartilage protection                                        |
| 32 | HOCl                     | Glycine                                                                                      | HIRI                | Reduced TNF- $\alpha$ ;<br>Alleviated liver injury                                   |
| 33 | HOCl                     | Neurotransmitters<br>(dopamine, 5-<br>hydroxytryptamine);<br>Antidepressants<br>(fluoxetine) | Depression model    | Restored BDNF;<br>Reduced neuroinflammation                                          |
| 34 | HOCl                     | Riluzole                                                                                     | Ischemic stroke     | Reduced ROS/LPO;<br>Neuroprotection                                                  |
| 35 | F <sup>-</sup>           | MB (photosensitizer)                                                                         | Dental plaque       | Enhanced antibacterial PDT                                                           |
| 36 | HOCl                     | MB (photosensitizer);<br>CTAB                                                                | Bacterial infection | Dual antibacterial mechanism;<br>Effective against <i>S. aureus</i> & <i>E. coli</i> |
